# Supplementary material for: Condensation effect-induced improved sensitivity for SERS trace detection on a superhydrophobic plasmonic nanofibrous mat
Source: Royal Society of Chemistry journal article supplement (doi:10.1039/c7ra09194j), 2017-01-01
Supplement: c7ra09194j1.pdf [file c7ra09194j1.pdf]

## Supporting

### Condensation effect-induced improved sensitivity for SERS trace detection on superhydrophobic plasmonic nanofibrous mat

Xiaohong Liang, Han Zhang, Cheng Xu, Ding Cao, Qiang Gao,\* and Si Cheng \*

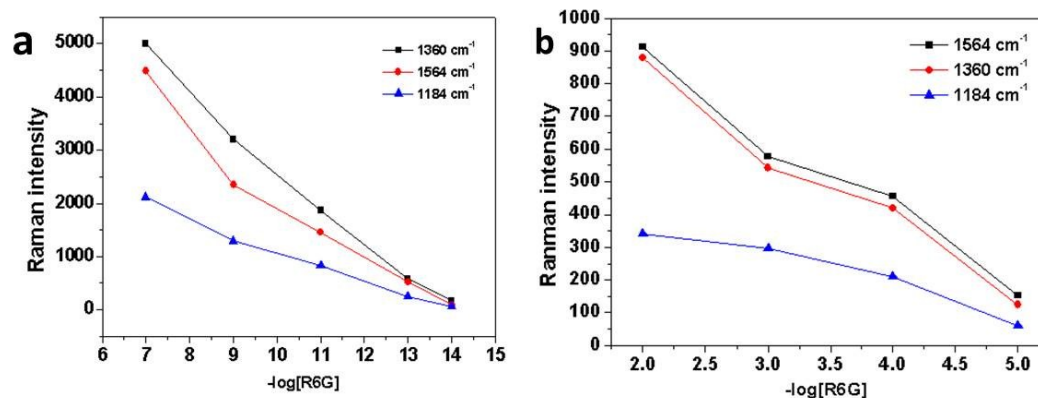

Figure S1. (a) SERS intensities at 1564  $\text{cm}^{-1}$ , 1360  $\text{cm}^{-1}$ , 1184  $\text{cm}^{-1}$  for R6G concentration on the superhydrophobic substrates ranging from  $10^{-7}$  to  $10^{-14}$  M; (b) SERS intensities at 1564  $\text{cm}^{-1}$ , 1360  $\text{cm}^{-1}$ , 1184  $\text{cm}^{-1}$  for R6G concentration on the non-superhydrophobic substrates ranging from  $10^{-2}$  to  $10^{-5}$  M.
